# Supplementary material for: Metachronal motion of artificial magnetic cilia
Source: Royal Society of Chemistry journal article supplement (doi:10.1039/c8sm00549d), 2018-01-01
Supplement: c8sm00549d1.pdf [file c8sm00549d1.pdf]

## Supplemental information

# Metachronal motion of artificial magnetic cilia

Srinivas Hanasoge, Peter J. Hesketh, Alexander Alexeev

George W. Woodruff school of Mechanical Engineering,  
Georgia Institute of Technology, Atlanta, GA, USA, 30332

**Video S1.** The video shows a metachronal wave propagating from the left to right in an array of magnetic cilia with increasing cilium lengths. The cilia are actuated by a rotating permanent magnet. The short cilia on the left complete the cycle first followed by the longer cilia resulting in the formation of a wave propagating along the ciliary array. The cilia are  $10\mu m$  in width, and  $60nm$  in thickness. Cilia length changes between  $60\mu m$  and  $600\mu m$ . The separation between neighboring cilia within a row is  $50\mu m$ . The actuation frequency is  $0.5Hz$ .

**Video S2.** The video shows two metachronal waves propagating in opposite directions away from the center of a ciliary array. The array consists of short cilia in the center and longer cilia near the edge. The wave propagates outwards from shorter cilia to longer cilia. The cilia are  $10\mu m$  in width, and  $60nm$  in thickness. Cilia length changes between  $60\mu m$  and  $600\mu m$ . The separation between neighboring cilia within a row is  $50\mu m$ . The actuation frequency is  $0.5Hz$ .
